# Supplementary material for: Association between medical students’ prior experiences and perceptions of formal online education developed in response to COVID-19: a cross-sectional study in China
Source: HighWire-hosted journal article supplement (doi:10.1136/bmjopen-2020-041886), 2020-10-01
Supplement: bmjopen-2020-041886supp001_data_supplement.pdf [file bmjopen-2020-041886supp001_data_supplement.pdf]

## Questionnaire for Chinese clinical medicine undergraduates during online education

### *Respondent Background Profile*

You gender:

male,  female

Area of your home location:

rural,  urban

Name of the medical school you enrolled in: \_\_\_\_\_

Learning phase you are study in:

general education,  basic medical education

clinical medical education,  clerkship rotation

Your academic performance based on your completed undergraduate study:

top 10%,  10%-25%,  25%-50%,  50%-75%,  bottom 25%

### *Prior online learning experiences*

Your familiarity with live broadcast courses:

unfamiliar,  neutral,  familiar

Your familiarity with MOOCs (massive open online courses):

unfamiliar,  neutral,  familiar

Your familiarity with SPOCs (small private online courses):

unfamiliar,  neutral,  familiar

Your familiarity with recorded broadcast courses:

unfamiliar,  neutral,  familiar

Your familiarity with online education platforms (e.g. Blackboard):

unfamiliar,  neutral,  familiar

Your familiarity with blended learning, which combines online and offline learning (e.g. flipped classroom):

unfamiliar,  neutral,  familiar

The degree to which you believe that online education would enhance your learning performance according to your existing experiences:

useless,  neutral,  useful

### *Perceptions of ongoing online education*

Your evaluations of ongoing online education:

(1) The online education is well prepared

strongly disagree,  disagree,  neutral,  agree,  strongly agree

(2) The instructors take responsibility for students' learning

strongly disagree,  disagree,  neutral,  agree,  strongly agree

(3) The platform provides good support and service

strongly disagree,  disagree,  neutral,  agree,  strongly agree

(4) Teaching arrangements are clear and reasonable

strongly disagree,  disagree,  neutral,  agree,  strongly agree

(5) Assessment and evaluation of learning are clear

strongly disagree,  disagree,  neutral,  agree,  strongly agree

(6) Interaction, feedback, and question answering are effective

strongly disagree,  disagree,  neutral,  agree,  strongly agree

(7) Online learning resources are sufficiently provided

strongly disagree,  disagree,  neutral,  agree,  strongly agree

Your overall satisfaction with ongoing online education:

I'm satisfied with ongoing online education:

strongly disagree,  disagree,  neutral,  agree,  strongly agree
